# Supplementary material for: Evaluation of compliance and accuracy in Parkinson’s disease motor symptom tracking: a comparative study of digital and traditional paper diaries using a smartphone application (MyParkinson’s)
Source: Front Neurol. 2025 Jan 29;16:1522721. doi: 10.3389/fneur.2025.1522721 (PMC11814194; doi:10.3389/fneur.2025.1522721)
Supplement: Supplementary file 1 [file Table_1.xlsx]

## Sheet: Sheet1
Group	Paper hour1	Paper hour2	Paper hour3	Paper hour4	Paper hour5	Paper hour6	Paper hour7	Paper hour8	Paper hour9	Paper hour10	Paper hour11	Paper hour12	Paper hour13	Paper hour14	Paper hour15	Paper hour16																	First Examination note																App Firs hour
P	p1_1	p1_2	p1_3	p1_4	p1_5	p1_6	p1_7	p1_8	p1_9	p1_10	p1_11	p1_12	p1_13	p1_14	p1_15	p1_16																	p2_1	p2_2	p2_3	p2_4	p2_5	p2_6	p2_7	p2_8	p2_9	p2_10	p2_11	p2_12	p2_13	p2_14	p2_15	p2_16	p3_1
Paper First	On	On	On	On	On	Off	Off	Off	Off	Off	Off	On	Off	On	Off	Off																	On	On	On	On	Off	Off	Off	Off	Off	Off	Off	Off	Off	On	On	On	On
App First	Sleep	Sleep	Sleep	Sleep	Sleep	On	On	On	On	On	On	On	On	On	On	Dyskinesia																	Off	Off	Off	Off	On	On	On	On	On	On	On	On	On	On	On	Dyskinesia	Sleep
Paper First	On	On	On	On	On	On	On	On	Sleep	Sleep	Off	Off	On	On	On	On																	On	On	On	On	On	Off	On	On	Off	On	On	On	Off	On	On	On	On
App First	On	On	On	On	On	On	On	On	On	On	On	On	On	On	On	On																	On	On	On	On	On	On	On	On	On	On	On	On	On	On	On	On	On
Paper First	Off	On	On	On	On	On	On	On	On	On	Off	On	Off	On	On	On																	On	On	On	On	On	On	Off	On	On	On	On	On	On	On	On	On	Off
Paper First	On	On	Dyskinesia	On	On	Dyskinesia	On	On	Dyskinesia	On	On	On	On	On	Dyskinesia	On																	Dyskinesia	On	Dyskinesia	On	On	Dyskinesia	On	On	Dyskinesia	On	On	Dyskinesia	On	On	On	Dyskinesia	Off
Paper First	On	On	On	On	Dyskinesia	Dyskinesia	Dyskinesia	Dyskinesia	Dyskinesia	Dyskinesia	Dyskinesia	On	On	Dyskinesia	Dyskinesia	Dyskinesia																	On	On	On	On	On	Dyskinesia	Dyskinesia	On	On	On	On	On	Dyskinesia	Dyskinesia	Dyskinesia	On	Sleep
App First	Off	Off	Off	On	Off	On	On	On	Off	On	Dyskinesia	On	Sleep	On	Dyskinesia	Off																	Off	Off	Off	On	On	On	Off	On	On	On	Off	Off	On	On	On	Off	On
Paper First	Off	On	On	Off	Off	On	On	On	Off	On	On	On	Dyskinesia	On	On	On																	Off	On	On	Off	Off	On	On	On	On	On	On	On	Off	On	On	Off	Off
App First	Sleep	Sleep	On	Sleep	Sleep	Off	Sleep	Sleep	Off	Sleep	Sleep	Sleep	Sleep	Sleep	Off	On																	Off	On	Off	Off	On	Off	Off	On	On	Off	Off	On	Off	Off	On	Off	Off
Paper First	On	Sleep	Sleep	Off	On	Off	Off	On	Sleep	Off	On	On	Off	On	On	Off																	On	On	On	Off	On	On	Off	On	On	Off	On	On	Off	On	On	Off	Sleep
Paper First	Off	On	On	On	Off	Off	On	On	On	On	Off	Off	On	On	On	Sleep																	Off	On	On	Off	Off	On	On	On	Off	Off	On	On	On	Off	On	Off	Sleep
App First	On	On	On	On	On	On	On	Sleep	Sleep	On	On	On	On	On	On	On																	On	On	On	On	On	On	On	On	On	On	On	On	On	On	On	On	On
Paper First	Dyskinesia	Dyskinesia	On	On	On	On	On	On	On	On	On	On	On	On	On	Dyskinesia																	On	On	On	On	On	On	Dyskinesia	Dyskinesia	On	On	On	On	On	On	On	On	Sleep
App First	On	On	On	On	On	On	On	On	On	On	On	On	On	On	On	On																	On	On	On	On	On	On	On	On	On	On	On	On	On	On	On	On	On
App First	Sleep	Off	Off	On	Off	On	On	Off	On	Off	Off	Off	Off	Dyskinesia	Dyskinesia	Off																	Off	Off	Off	On	Off	On	Dyskinesia	On	Dyskinesia	Dyskinsia	On	Off	On	On	On	On	On
App First	Off	On	On	On	Off	Off	Off	Off	Off	Off	Off	Off	Off	Off	Off	Off																	On	On	On	On	On	Off	Off	Off	Off	Off	Off	Off	Off	Off	Off	Off	Sleep
Paper First	Sleep	Sleep	Sleep	On	On	On	On	Off	Off	Off	Off	On	Off	On	On	Off																	On	On	On	On	On	Off	Off	Off	Off	On	On	On	On	On	On	Off	Sleep
App First	Off	Off	Off	On	On	On	On	On	On	On	Off	Off	Off	On	On	Off																	On	On	On	On	On	Dyskinesia	On	Off	Off	Off	On	On	On	On	Off	Off	Sleep
App First	On	On	On	On	Off	On	On	On	On	Off	On	Off	On	On	Off	Off																	On	On	Off	On	On	On	Off	On	On	On	Off	On	On	Off	On	On	On
App First	Dyskinesia	Dyskinesia	Off	Off	Off	On	On	On	On	Dyskinesia	Sleep	Off	Off	Off	On	On																	Off	On	On	On	On	Off	On	On	Off	On	On	Off	On	On	On	On	On
App First	On	On	Off	Off	On	Off	Off	On	Off	Off	Off	On	On	Off	Off	Off																	Off	On	On	Off	On	On	Off	On	On	Off	On	On	Off	On	On	Off	Sleep
App First	Off	Sleep	On	On	On	On	Off	On	Off	Sleep	On	Off	On	On	On	On																	Off	Off	On	On	On	On	On	On	On	On	On	On	On	Off	On	On	On
App First	Off	Off	On	On	On	On	On	On	Off	Off	On	On	On	On	On	On																	Off	Off	On	Off	Off	On	Off	Off	On	Off	Off	On	Off	Off	On	Off	Off
App First	Sleep	Sleep	On	On	On	On	On	On	On	Off	Off	On	On	Off	Sleep	Sleep																	On	On	On	On	On	On	On	On	On	On	Off	On	On	On	On	On	Sleep
App First	Off	Off	Off	On	Off	Off	Off	Off	Off	Off	Off	Off	Off	Off	Off	Off																	Off	On	On	Off	On	Off	On	Off	On	On	Off	On	On	Off	On	On	On
Paper First	On	On	On	On	On	Dyskinesia	On	On	On	On	Dyskinesia	On	Dyskinesia	Dyskinesia	Dyskinesia	Dyskinesia																	On	Dyskinesia	Dyskinesia	On	Dyskinesia	Dyskinesia	On	Dyskinesia	Dyskinesia	On	Dyskinesia	Dyskinesia	On	Dyskinesia	Dyskinesia	On	On
Paper First	On	Off	Sleep	Sleep	Sleep	Off	Sleep	Dyskinesia	On	On	On	On	Dyskinesia	On	On	On																	Off	Off	On	On	Off	On	On	On	Off	On	On	On	Off	On	On	On	Off
App First	On	On	On	On	On	Off	Off	Off	On	On	Off	On	On	Off	On	Off																	On	On	On	On	Off	On	Off	Off	Off	Off	Off	On	On	On	Off	Off	On
Paper First	Off	Off	On	Off	On	Off	Off	Off	Off	Off	On	On	Off	On	On	Off																	Off	On	On	Off	On	On	Off	On	On	Off	On	On	Off	On	On	Off	On
Paper First	Off	Sleep	Off	Off	On	On	Off	On	On	Off	Off	Off	On	Off	On	Off																	Off	Off	On	Off	Off	On	Off	Off	On	Off	Off	On	Off	Off	On	Off	Off
Paper First	On	On	On	On	On	On	On	On	On	On	On	On	On	Off	Off	Off																	On	On	On	On	On	On	On	On	On	On	On	Off	Off	Off	Off	Off	On
[truncated: 54 more columns]
